# Supplementary material for: Large-scale Pan-cancer Cell Line Screening Identifies Actionable and Effective Drug Combinations
Source: PubMed Central journal article supplement (PMC11061612; doi:10.1158/2159-8290.cd-23-0388), 2024-03-08
Supplement: cd-23-0388_supplementary_figures_s1-s16_suppsf1.pdf [file cd-23-0388_supplementary_figures_s1-s16_suppsf1.pdf]

# Supplementary Figures

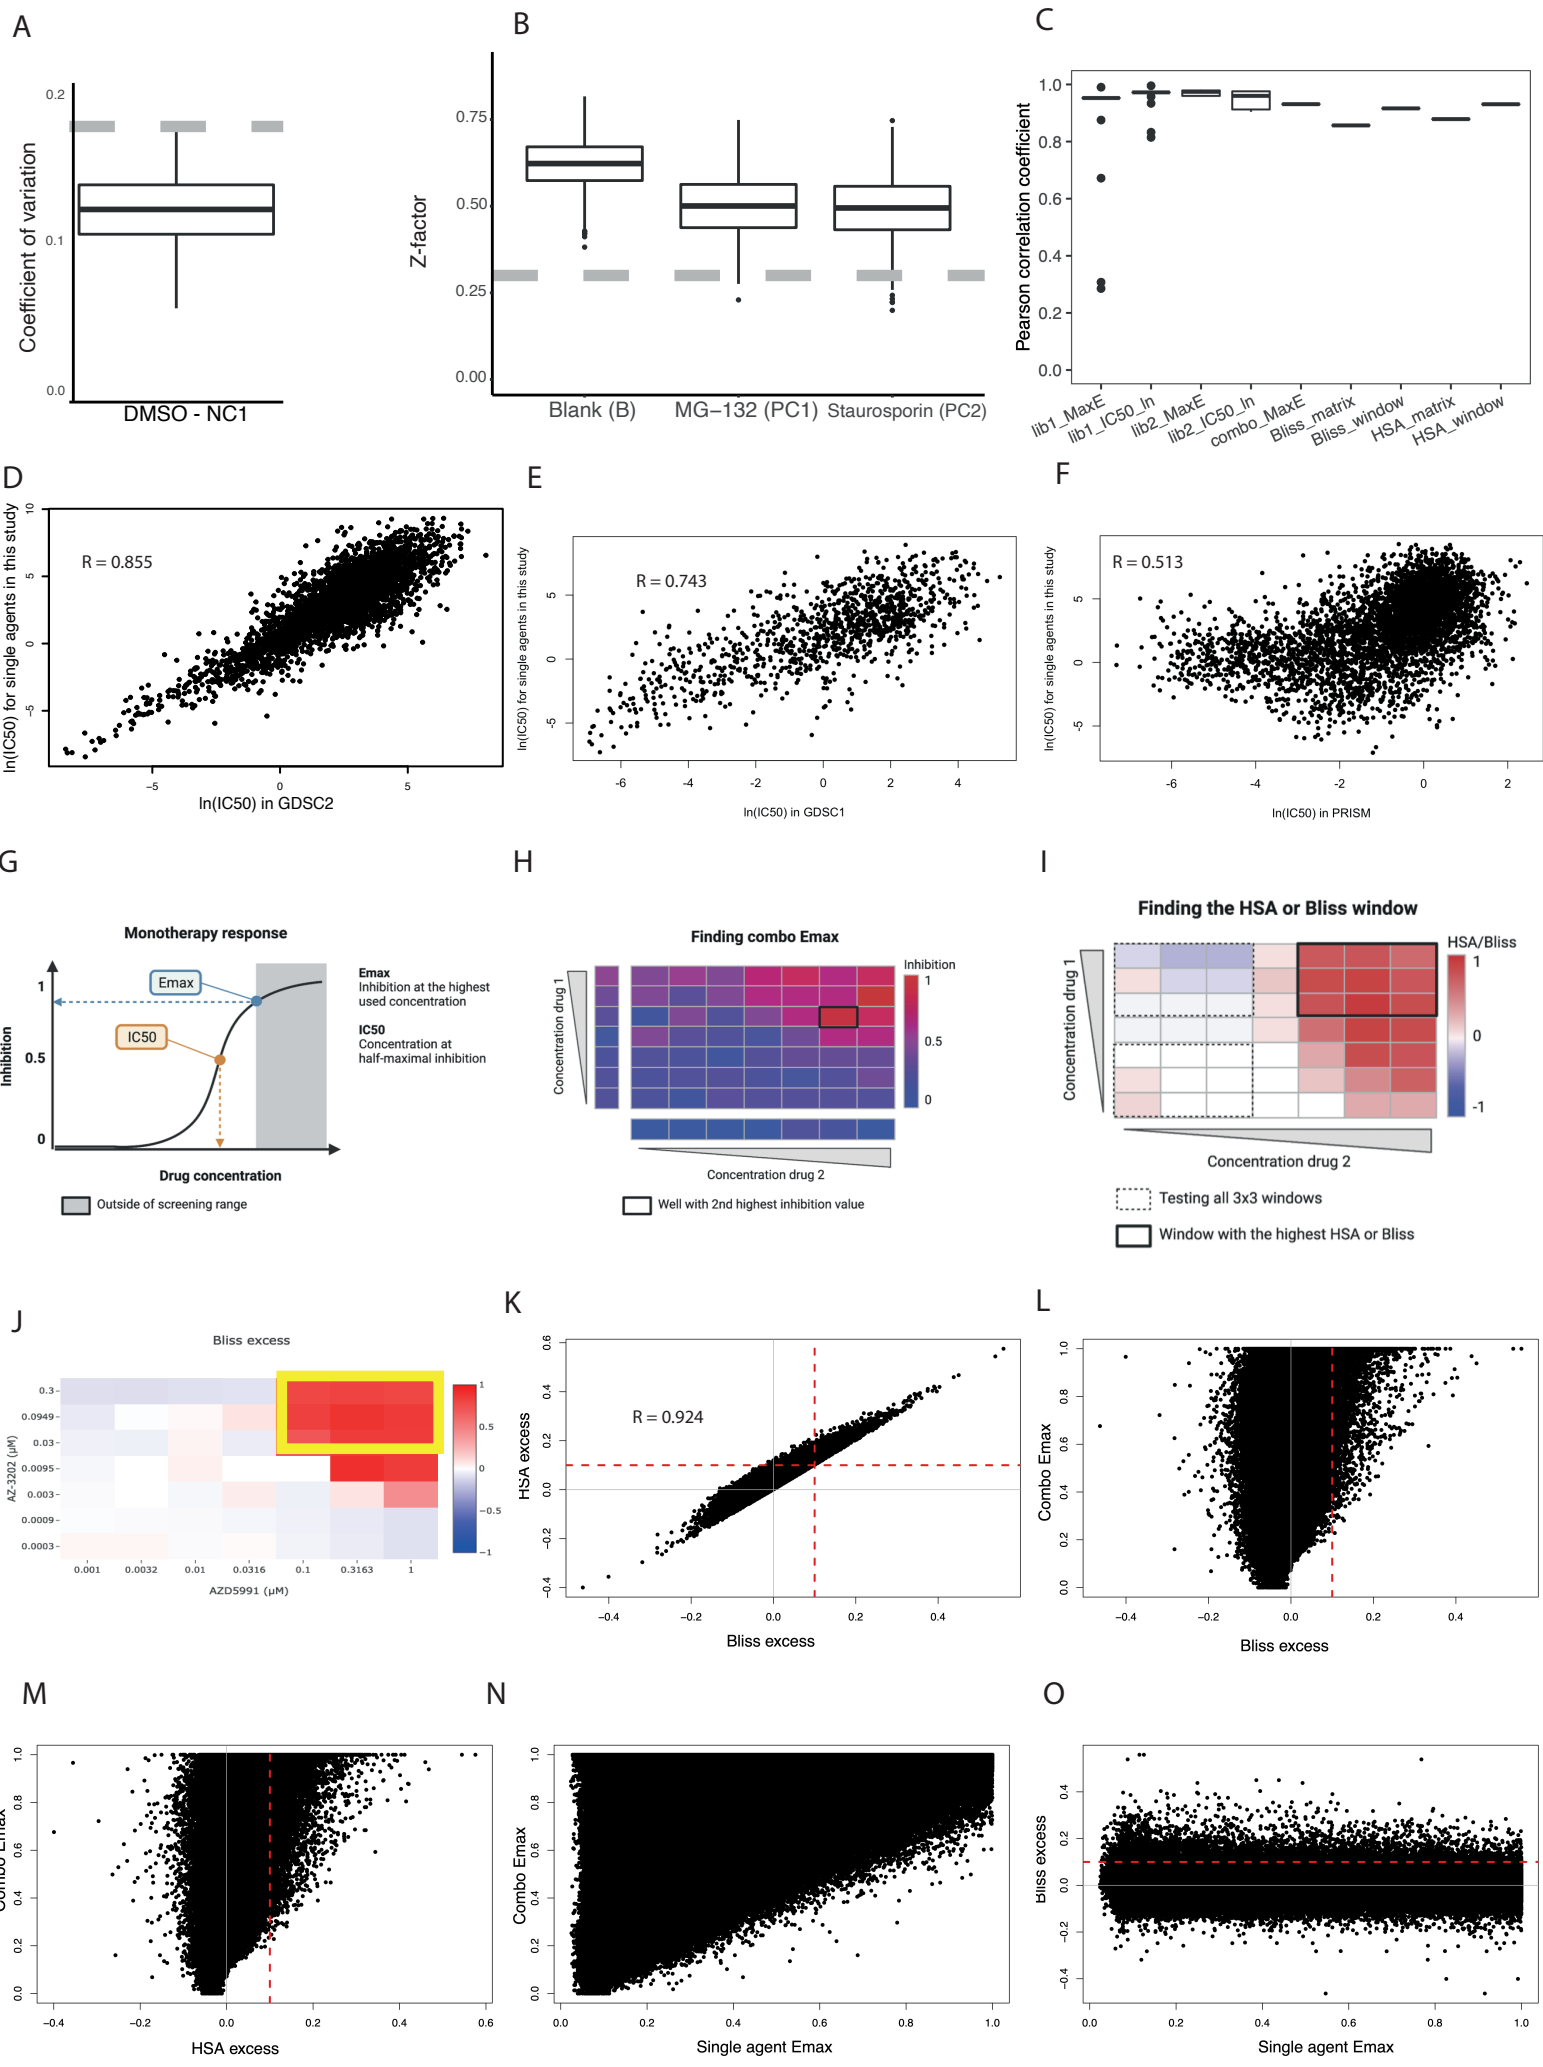



## Supplementary Figure 1: Additional overview of screen and quality control

A: coefficient of variation boxplot for negative control wells.

B: Z-factor for positive and negative controls. MG-132 and staurosporin are positive control drugs with potent cytotoxic cell activity.

C: Correlations for replicate screenings of cell lines.

D: Schematic of how single agent IC50 and Emax are determined from fitted drug response curves

E: Schematic of experimental screening plate layout and how combination Emax is calculated

F: Schematic of how Bliss and HSA matrix and window values are obtained

G: Example of a combination matrix where there is a much higher Bliss synergy excess for the window highlighted in yellow (0.823) versus the Bliss matrix excess (0.180)

H: Scatterplot of HSA vs Bliss, showing high correlation between the two synergy metrics.

I and J: Scatterplots of correlations between Emax and Bliss (I) or HSA (J).

K: Scatter plots showing lack of correlation between combo Emax vs single agent Emax, showing the value of single agent screening.

L: Scatter plots showing lack of correlation between Bliss score vs single agent Emax, showing the value of single agent screening

M: Scatterplot of  $\ln(\text{IC}_{50})$  of single agents in this study versus  $\ln(\text{IC}_{50})$  of single agents in previously published GDSC2 screen showing high correlation (Pearson  $R = 0.855$  (3dp)).

N: Scatterplot between  $\ln(\text{IC}_{50})$  of single agents in this study versus  $\ln(\text{IC}_{50})$  of single agents in the GDSC1 screen dataset showing good correlation (Pearson  $R = 0.743$  (3dp)) across the 699 cell lines and two compounds screened in both projects. The screening protocol differs between the studies: Resazurin or Syto60 staining in 96- or 384-well plates for GDSC1, versus CellTiteGlo in 1536-well plates as used in this study.

O: Scatterplot between  $\ln(\text{IC}_{50})$  of single agents in this study versus  $\ln(\text{IC}_{50})$  of single agents in the PRISM screen with a distinctly different screening protocol, showing moderate correlation (Pearson  $R = 0.513$  (3dp)) across the 346 cell lines and 13 compounds screened in both projects. There are multiple differences in protocol between the two studies, notably the use of barcoded pools of 20-25 cell lines in PRISM and a 5-day viability assay, versus individual cell lines and a 3-day viability assay used in this study.

A

|                              | 'High activity and synergy' in this study | Not 'high activity and synergy' in this study |
|------------------------------|-------------------------------------------|-----------------------------------------------|
| Synergy in Jaaks, et al.     | 724<br>(15.1%)                            | 369<br>(7.7%)                                 |
| Not synergy in Jaaks, et al. | 1,283<br>(26.8%)                          | 2,414<br>(50.3%)                              |

B

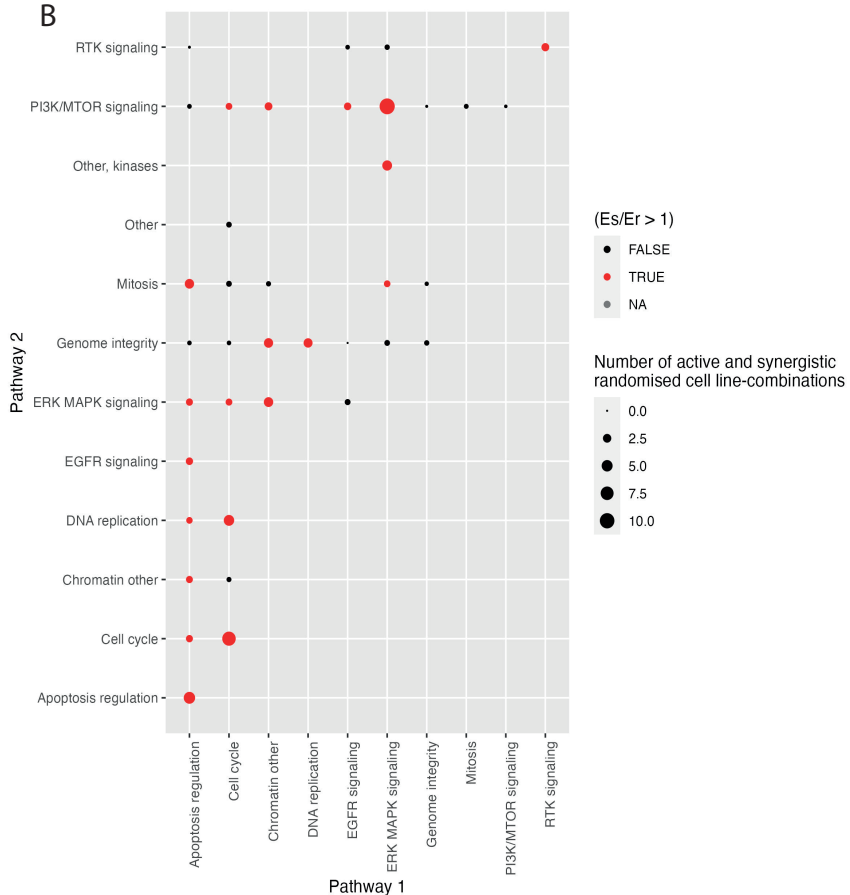

C

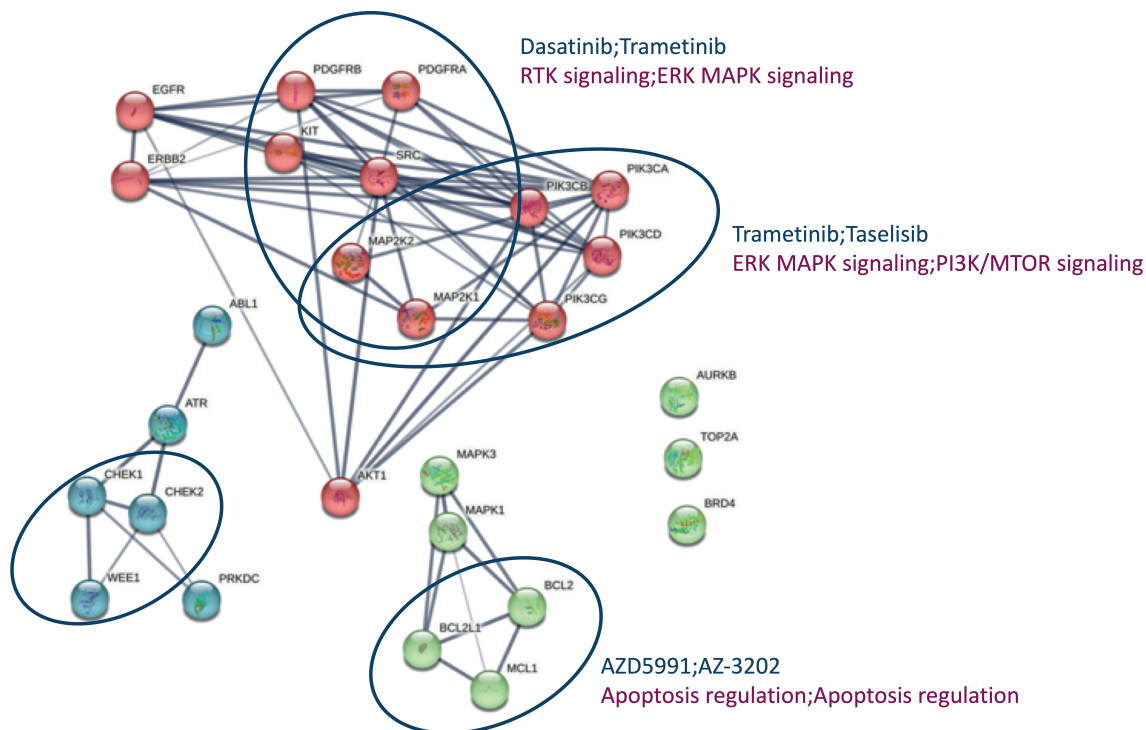

Combination  
Pathways

**Supplementary Figure 2: Combination benefit in combination-cell line pairs**

A: Comparison of classification of 4,790 combination-cell line pairs from 9 combination and 114 cell lines screened in both this study and another study (Jaaks P, et al. Nature 2022). 15.1% of combination-cell line pairs are classified as hits in both studies, and 50.3% of combination-cell line pairs are classified as non-hits in both studies. We observe good concordance despite use of differing study designs and synergy metrics.

B: Scatterplot of drug pathway-combination-cell line pairs enriched for combination benefit. Es/Er is the ratio between proportion of combinations with combination benefit over the proportion of random combinations. A ratio of >1 signifies enrichment.

C: Protein interaction map (derived from STRINGdb) of all broadly synergistic targets and their corresponding combinations. AZD5991 + AZ-3202, prexasertib + AZD1775 and SRA373 + AZD1775 are intra-pathway combinations within the apoptosis regulation and cell cycle pathways. The target genes of combinations AZD5991 + AZ-3203, AZD5153 + selumetinib and trametinib + taselesib have high synthetic lethal confidence scores.

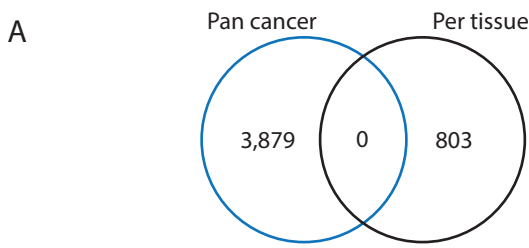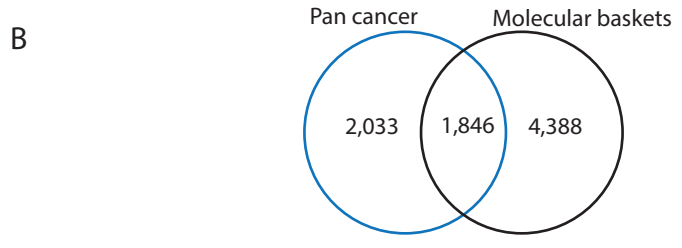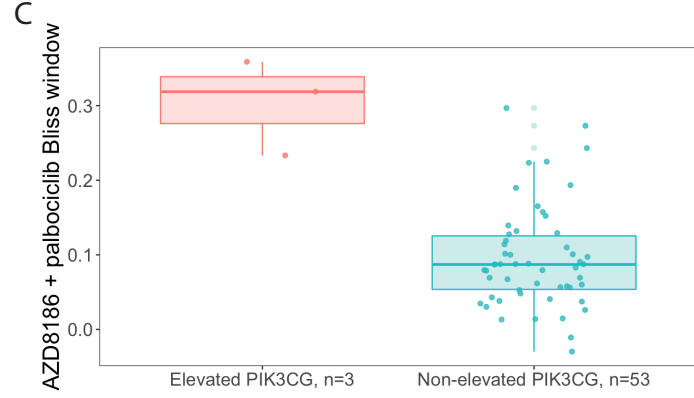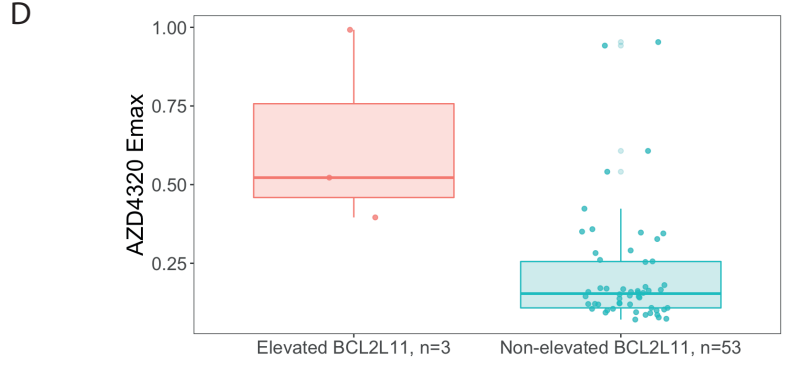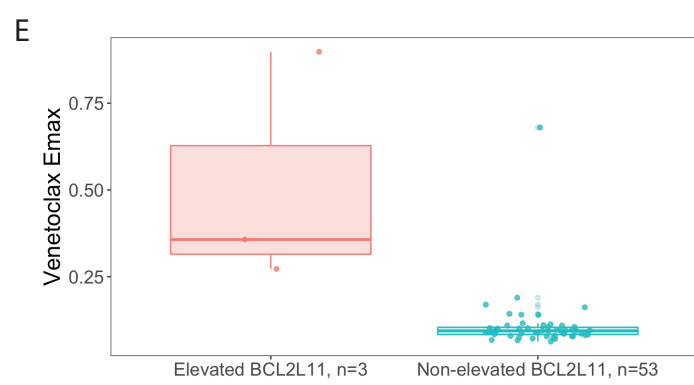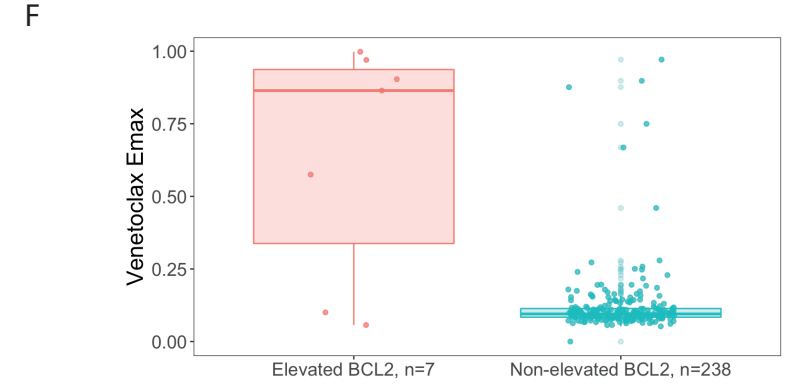

**G**

| Pathway                           | CD+CD | DDR+DDR | CS+CS | CS+CD | CS+DDR | CD+DDR | CD+chemo/<br>other | DDR+chemo/<br>other | CS+chemo/<br>other |
|-----------------------------------|-------|---------|-------|-------|--------|--------|--------------------|---------------------|--------------------|
| Allograft rejection               |       | **      | ***   | ***   | ***    | **     | ***                | **                  | *                  |
| Androgen response                 |       | *       | **    |       | **     | *      | *                  | *                   |                    |
| Angiogenesis                      |       |         |       | *     |        |        |                    |                     |                    |
| Apical junction                   |       | ***     | ***   | ***   | ***    | ***    | **                 | **                  |                    |
| Apical surface                    |       |         | *     | **    | ***    |        | **                 | **                  |                    |
| Apoptosis                         | ***   | ***     | ***   | ***   | ***    | ***    | ***                | ***                 |                    |
| Coagulation                       |       | *       |       |       |        |        |                    | *                   |                    |
| Complement                        | *     | ***     | ***   | ***   |        | ***    | **                 | ***                 | *                  |
| DNA repair                        | *     |         |       | *     |        | *      |                    |                     |                    |
| E2F targets                       | ***   | ***     | ***   | ***   | ***    | ***    | ***                | ***                 |                    |
| Epithelial mesenchymal transition |       | ***     | **    | ***   |        | **     | ***                |                     |                    |
| Estrogen response early           | **    | ***     | ***   | ***   | ***    | ***    | ***                | **                  |                    |
| Estrogen response late            | *     | *       | ***   | ***   | **     | **     | **                 | *                   |                    |
| G2-M checkpoint                   | ***   | ***     | ***   | ***   | ***    | ***    | ***                | ***                 | *                  |
| Glycolysis                        |       | **      | ***   | ***   | ***    | **     | ***                | **                  |                    |
| Hedgehog signaling                |       | **      |       | **    | *      |        | *                  | *                   |                    |
| Hypoxia                           | **    | ***     | ***   | ***   | ***    | ***    | ***                | ***                 |                    |
| IL-2/STAT5 signaling              | ***   | **      | ***   | ***   | ***    | ***    | ***                | ***                 |                    |
| IL-6/JAK/STAT3 signaling          | ***   | **      | ***   | ***   | **     | ***    | ***                | ***                 |                    |
| Inflammatory response             |       | ***     | *     | ***   | *      | *      | *                  | **                  | *                  |
| Interferon gamma response         |       | **      | **    |       |        | *      |                    | *                   |                    |
| KRAS signaling up                 | *     | ***     | ***   | ***   | ***    | ***    | ***                | ***                 | *                  |
| Mitotic spindle                   | ***   | ***     | *     | ***   | ***    | ***    | **                 | ***                 |                    |
| mTORC1 signaling                  |       | *       | *     | *     |        |        | *                  |                     | *                  |
| Myc targets V1                    |       |         |       |       |        |        | *                  |                     |                    |
| Myogenesis                        |       | ***     | *     | *     | **     | ***    |                    | *                   |                    |
| Notch signaling                   | **    | *       |       |       | ***    |        |                    |                     |                    |
| p53 pathway                       | ***   | ***     | ***   | ***   | ***    | ***    | ***                | ***                 |                    |
| PI3K/AKT/mTOR signaling           | **    | ***     | ***   | ***   | ***    | ***    | ***                | **                  | *                  |
| Protein secretion                 |       | *       |       |       |        |        |                    | *                   |                    |
| Spermatogenesis                   |       |         |       |       | *      |        |                    | *                   |                    |
| TGF-beta signaling                | *     | ***     | ***   | ***   | ***    | ***    | ***                | ***                 |                    |
| TNF-alpha signaling via NF-kB     | **    | ***     | ***   | ***   | ***    | ***    | ***                | **                  | *                  |
| Unfolded protein response         |       |         |       | **    |        |        |                    |                     |                    |
| UV response down                  | *     | **      | ***   | ***   | ***    | ***    | ***                | ***                 |                    |
| UV response up                    | **    | ***     | ***   | ***   | ***    | ***    | ***                | ***                 |                    |
| Wnt-beta catenin signaling        | **    | **      | ***   | **    | ***    | ***    | ***                | **                  |                    |
| Xenobiotic metabolism             |       | *       |       |       |        |        |                    |                     |                    |

\* P < 0.05

\* P < 0.01

\* P < 0.001

### **Supplementary Figure 3: Biomarkers of single agent and combination activity**

A: Overlap of significant large effect biomarkers from pan-cancer and per cancer-type analyses. B: Overlap of significant large effect biomarkers from pan-cancer and pan-cancer molecular basket analyses. C - F: Example combination biomarkers that match the target or target pathway of one of the drugs.

G: Enriched pathways for all biomarkers in each drug combination category based on adjusted p-values: \*  $0.05 < p < 0.01$ , \*\*  $0.01 < p < 0.001$ , \*\*\*  $p < 0.001$  (CD = cell death, CS = cell signaling, chemo = chemotherapeutic agents, DDR = DNA damage response).



**Supplementary Figure 4: Combination activity of venetoclax plus AZD5991 in AML cell lines.**

A: Combination Emax versus HSA scores in 19 AML cell lines. Red dots are responder cell lines (combination Emax > 0.5 and HSA > 0.1).

B: Representative screen combination growth inhibition (top) and HSA excess matrix plots in the cell line GDM1.

C: AZD5991 plus venetoclax combination activity in 41 cancer types included in this study. Each dot represents a cell line. Cell lines showing high combination activity (Emax > 0.5 and HSA > 0.1) are in red.

D: STRING analysis of large (effect size >1) and significant ( $p < 0.05$ , FDR < 10) combination biomarkers in all or genetic baskets, highlighting the interactome of targets (MCL1, BCL2) and biomarkers.

A

AZD5991 (MCL1); AZ3202 (BCL-XL) (GDSC\_010)

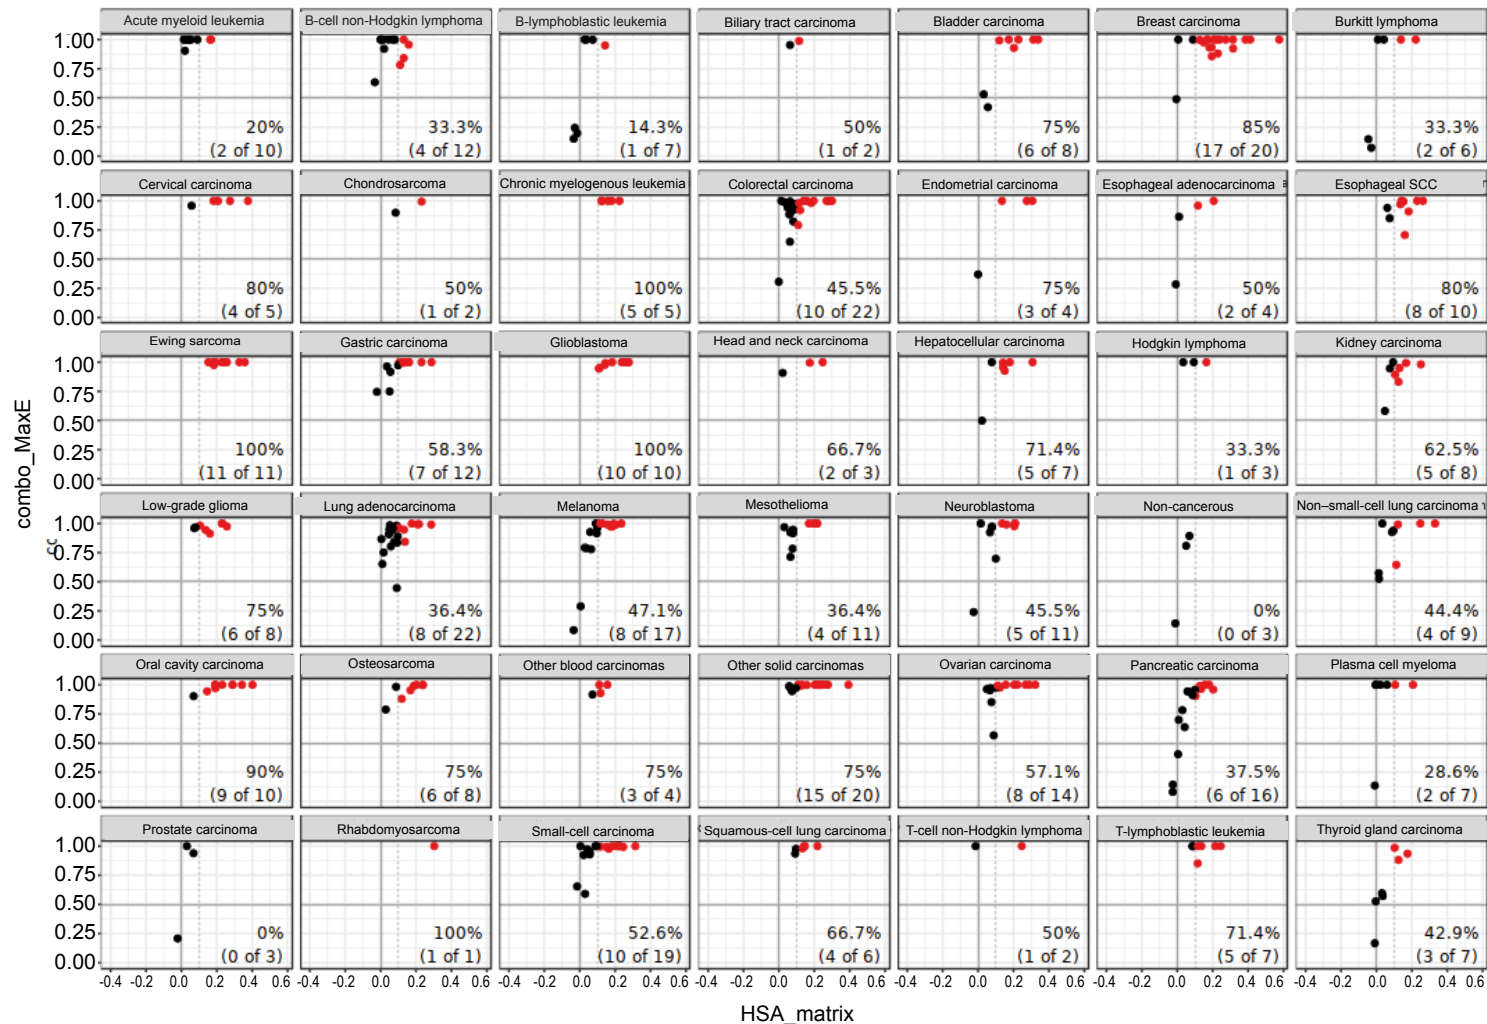



**Supplementary Figure 5: Combination activity by cancer type for AZD5991 + AZ3202**

A: AZ3202 plus AZD5991 combination activity in 41 cancer types included in this study.

Each dot represents a cell line. Cell lines showing high combination activity ( $E_{max} > 0.5$  and  $HSA > 0.1$ ) are in red.

**A**

## Venetoclax (BCL2); selumetinib (MEK) (GDSC\_008)

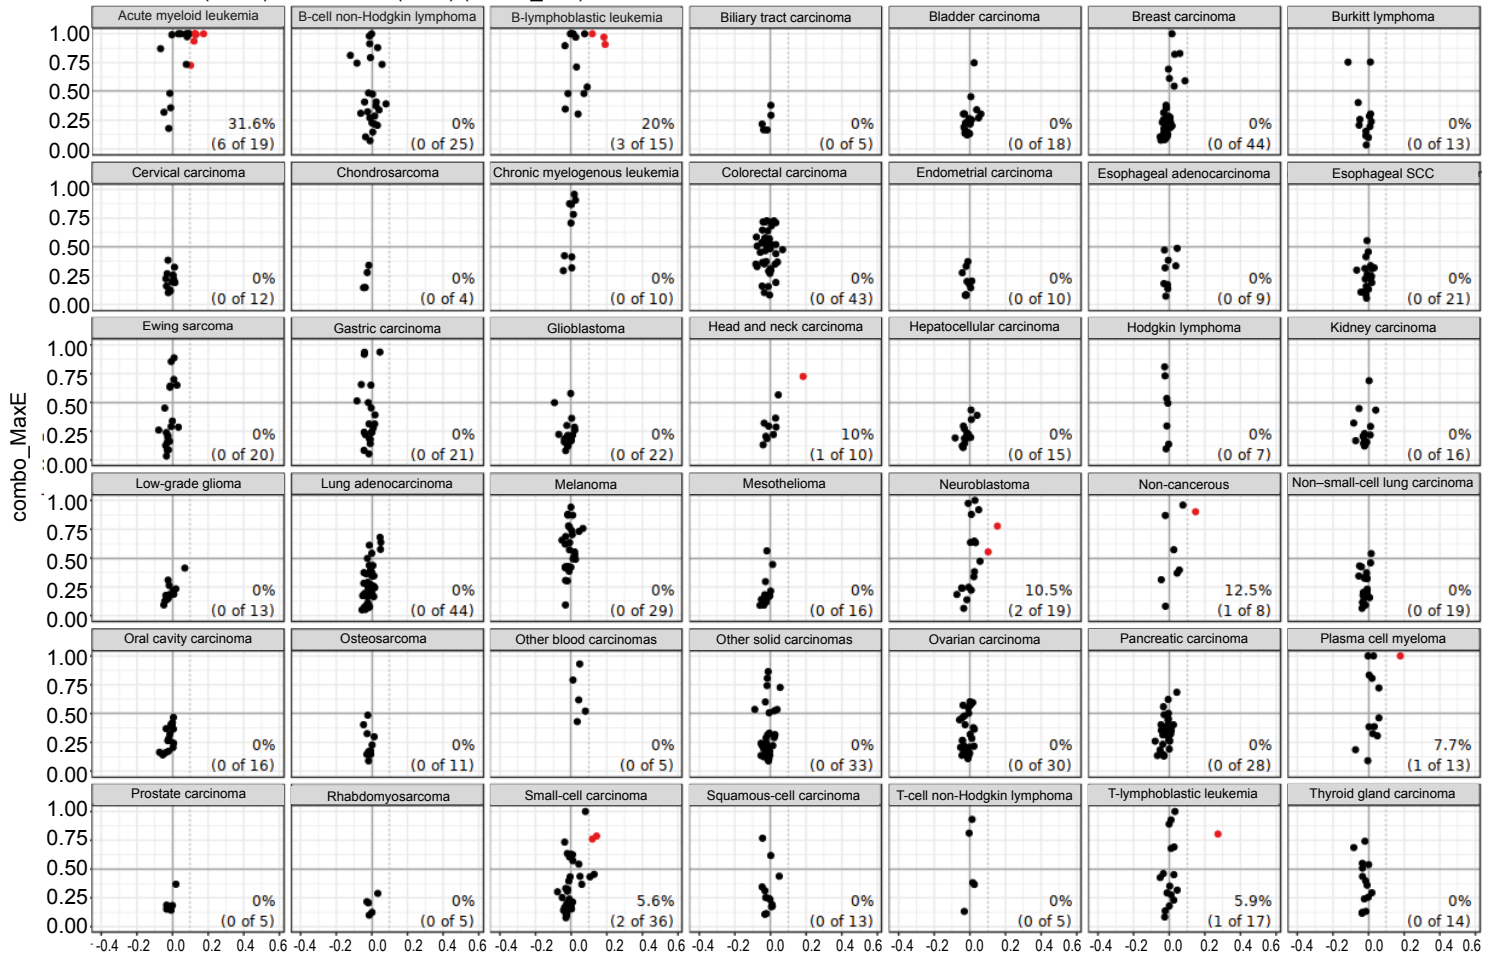**B**

## AZD5991 (MCL1); selumetinib (MEK) (GDSC\_008)

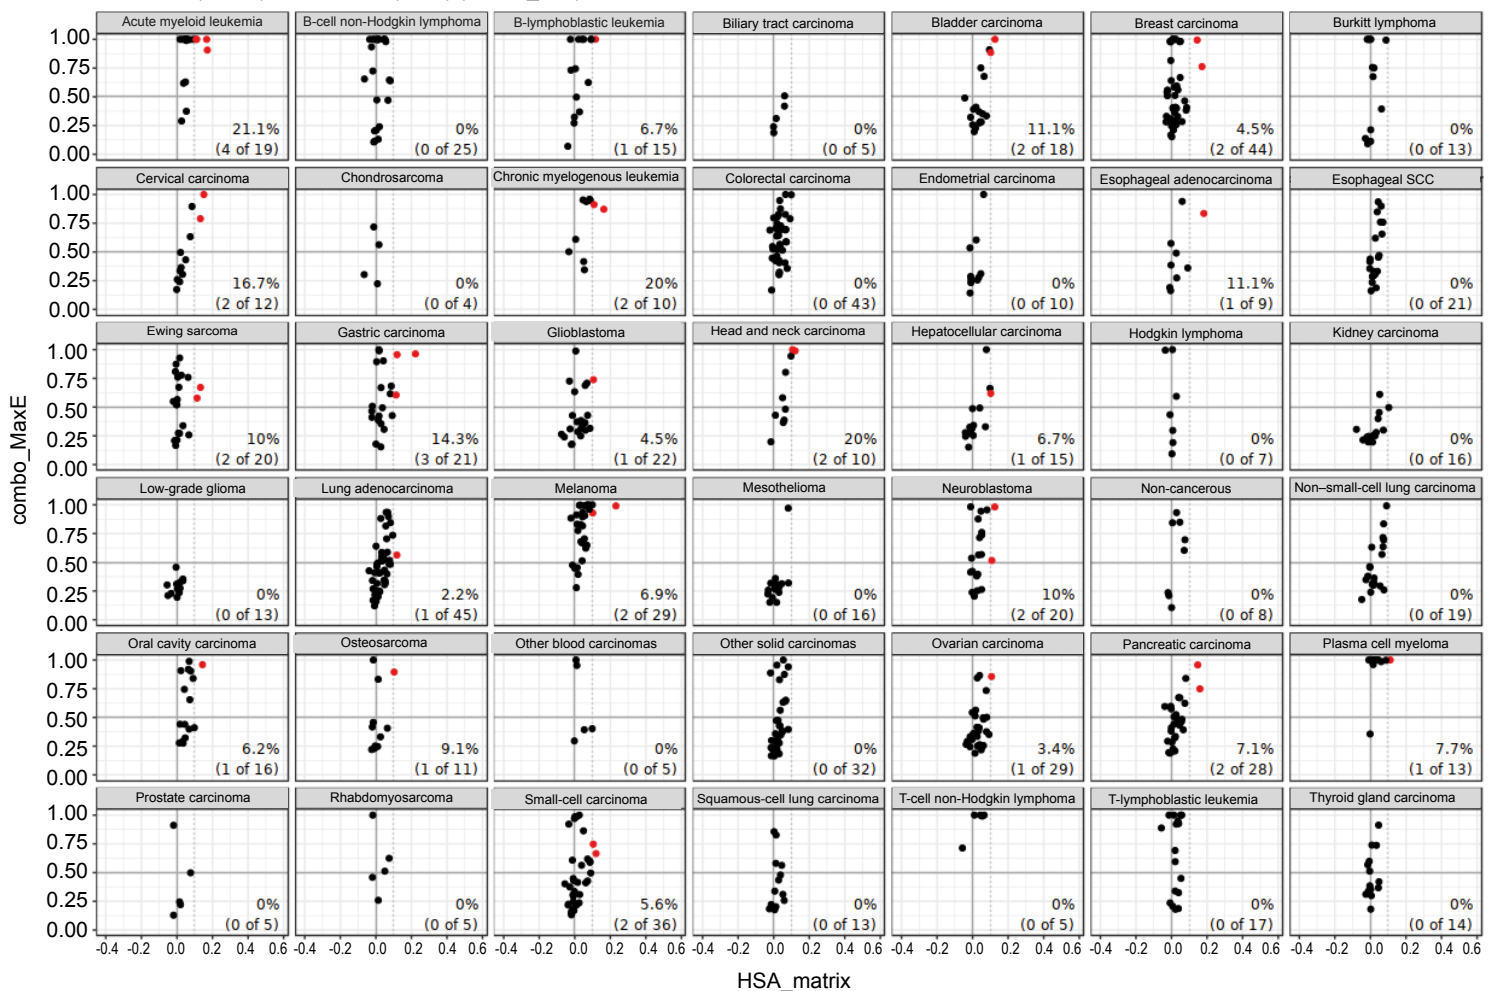

**Supplementary Figure 6: Venetoclax + selumetinib and AZD5991 + selumetinib activity by cancer type.**

A: Venetoclax plus selumetinib or (B) AZD5991 plus selumetinib combination activity (combination Emax versus HSA) in 41 cancer types included in this study. Each dot represents a cell line and cell lines showing high combination activity (combination Emax > 0.5 and HSA > 0.1) are in red.

**A**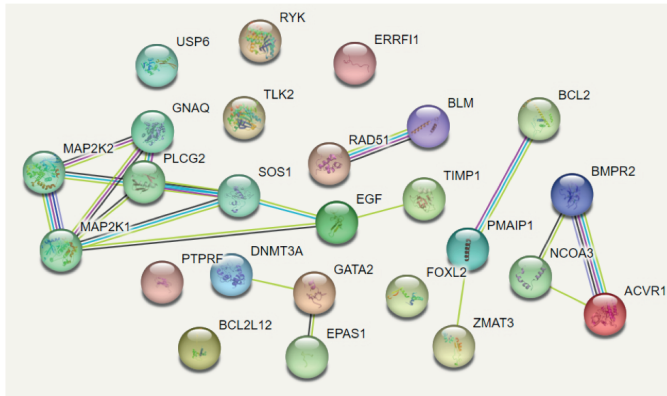**B**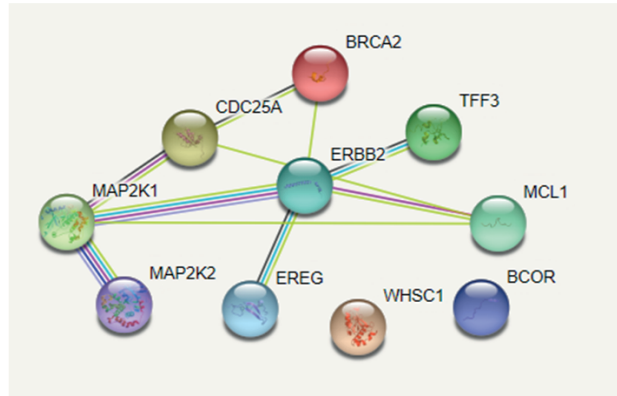

**Supplementary Figure 7: Venetoclax + selumetinib and AZD5991 + selumetinib activity by cancer type.**

A: Selumetinib plus venetoclax STRING analysis of large (effect size >1) and significant ( $p < 0.05$ , FDR < 10) combination biomarkers in all or genetic baskets.

B: Selumetinib plus AZD5991 STRING analysis of large (effect size >1) and significant ( $p < 0.05$ , FDR < 10) combination biomarkers in all or genetic baskets.



**Supplementary Figure 8: Effect of MEK1/2 plus BCL2 inhibition on cell viability in AML cells.**

Cell viability and HSA excess following treatment for 3 days with using 6 x 6 drug combination matrix in A) NOMO1 B) HL60 and C) ML2 cells. Cells were treated with MEK1/2 inhibitors selumetinib or trametinib in combinations with BCL2 inhibitor venetoclax or BCL1 inhibitors S55746. In top panels zero represents DMSO control, values 1 - 100 represent % growth inhibition, and values > 100 represent cell death. HSA excess heatmaps indicate dose range where combination benefit was achieved.

**A**

Selumetinib + AZD5991

Selumetinib + tapotoclax

Trametinib + AZD5991

Trametinib + tapotoclax

NOMO1

Signals

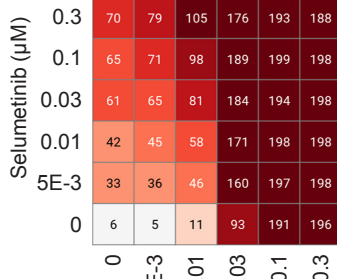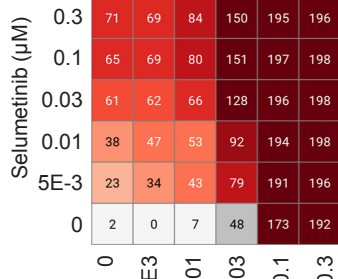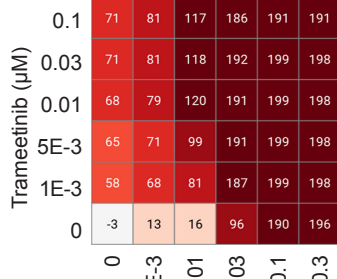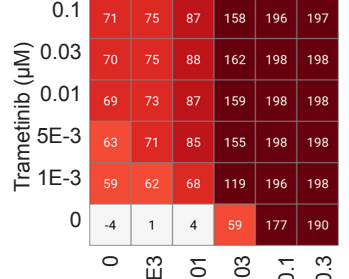

Excess

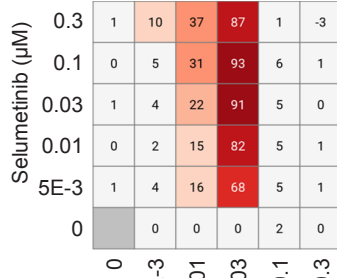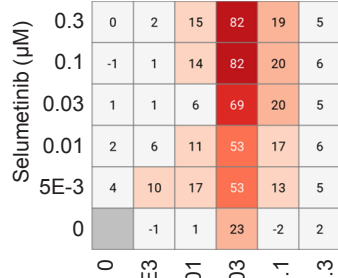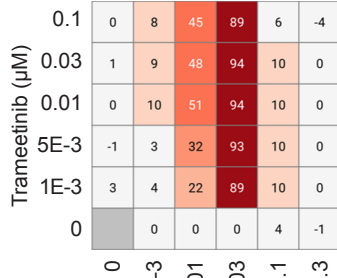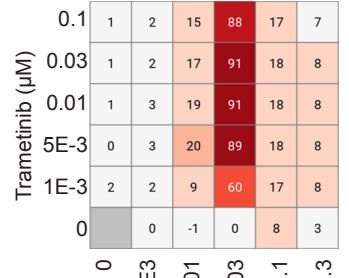AZD5991 (μM)  
HSA 12.2Tapotoclax (μM)  
HSA 11.1AZD5991 (μM)  
HSA 15.7Tapotoclax (μM)  
HSA 14.4**B**

HL60

Signals

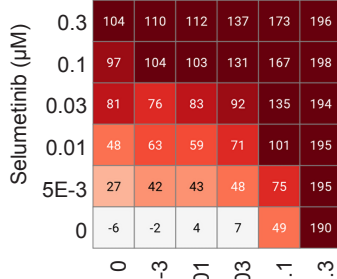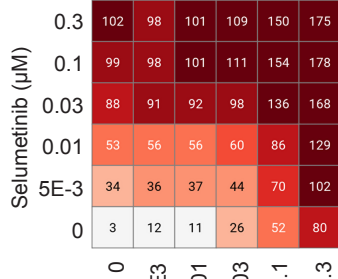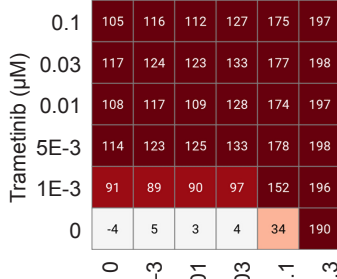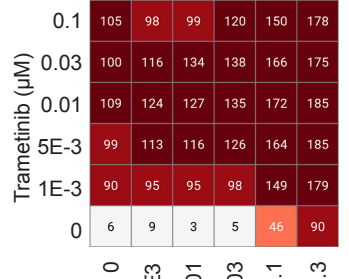

Excess

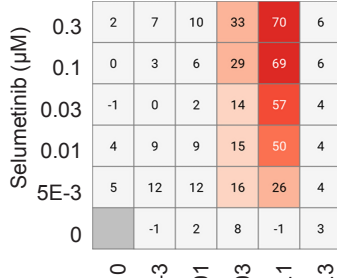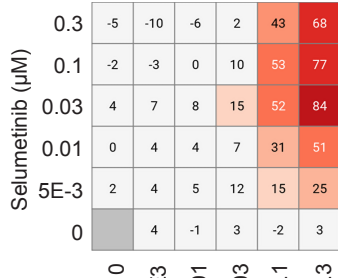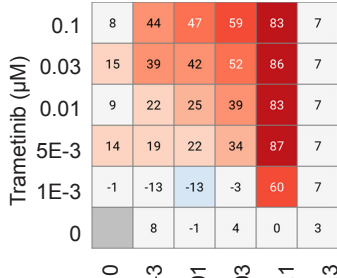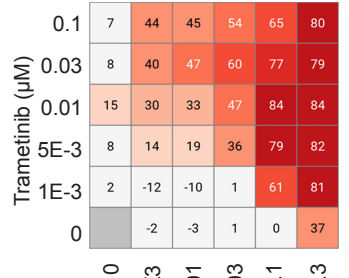AZD5991 (μM)  
HSA 10.3Tapotoclax (μM)  
HSA 8.6AZD5991 (μM)  
HSA 18.5Tapotoclax (μM)  
HSA 22.1**C**

ML2

Signals

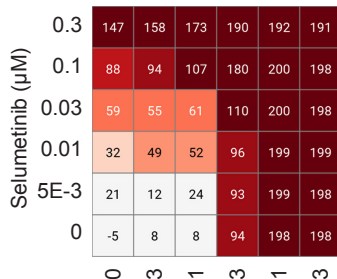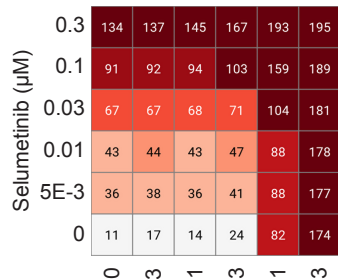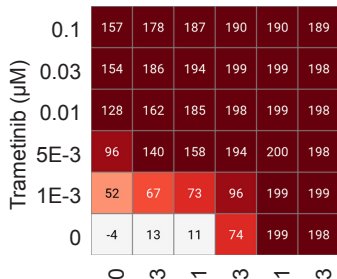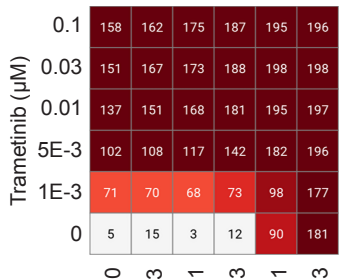

Excess

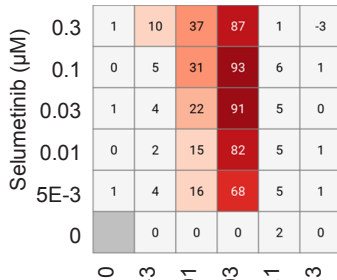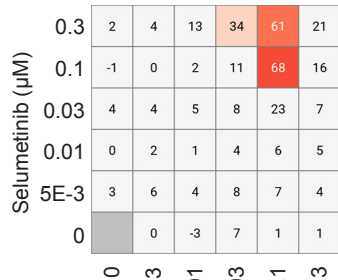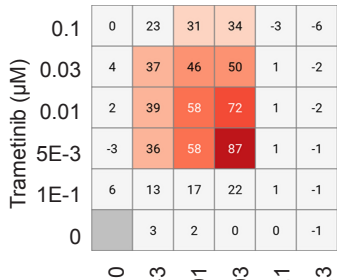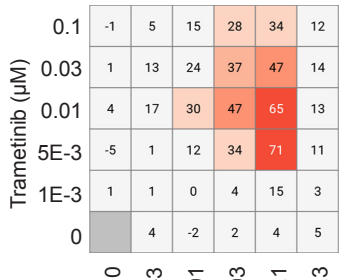AZD5991 (μM)  
HSA 5.4Tapotoclax (μM)  
HSA 7.5AZD5991 (μM)  
HSA 11.1Tapotoclax (μM)  
HSA 12.4



**Supplementary Figure 9: Effect of MEK1/2 plus MCL1 inhibition on cell viability in AML cells.**

Cell viability and HSA excess following treatment for 3 days with a 6 x 6 drug combination matrix in A) NOMO1 B) HL60 and C) ML2 cells. Cells were treated with MEK1/2 inhibitors selumetinib or trametinib in combinations with MCL1 inhibitor AZD5991 and tapotoclax. In the top panels, zero represents DMSO control, values 1 - 100 represent % growth inhibition and values > 100 represent cell death. HSA excess heatmaps indicate dose range where combination benefit was achieved

Venetoclax (BCL2); AZD2811(AURKB) (GDSC\_008)

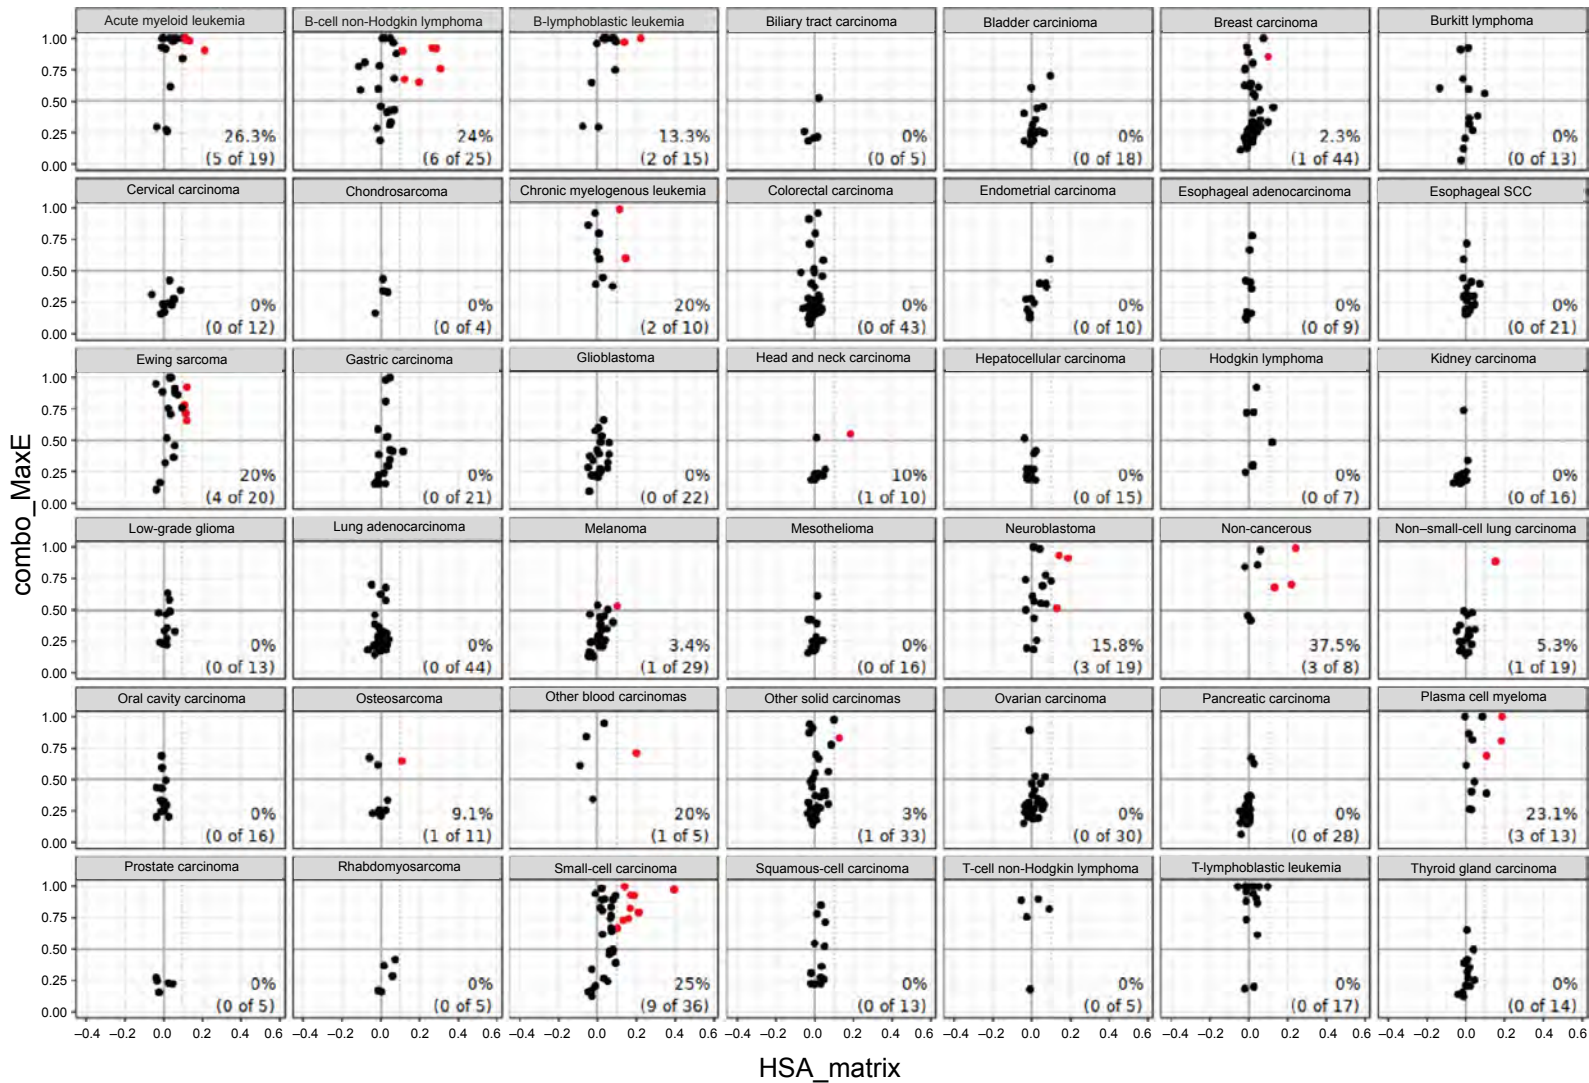

**Supplementary Figure 10: Cancer type selectivity of venetoclax + AZD2811.**

A: Venetoclax plus AZD2811 combination activity (combination Emax versus HSA) in 41 cancer types included in this study. Each dot represents a cell line and cell lines showing high combination activity (combination Emax > 0.5 and HSA > 0.1) are in red.

**A**

WSUDLBCL2

AZD2811 + Venetoclax

AZD2811 + S55748

Danusertib + Venetoclax

Danusertib + S55748

Signals

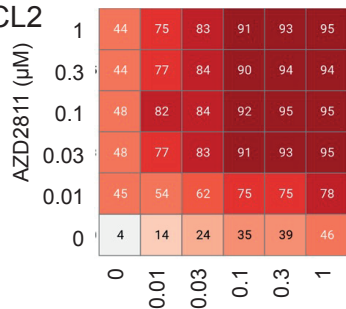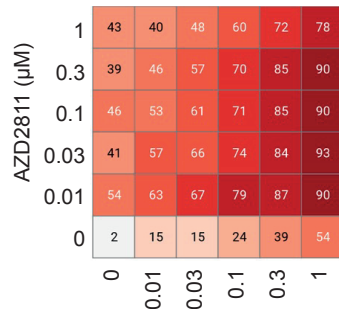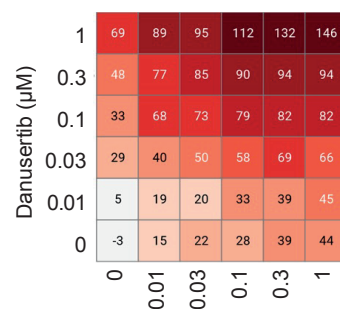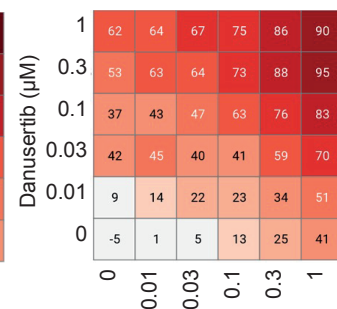

Excess

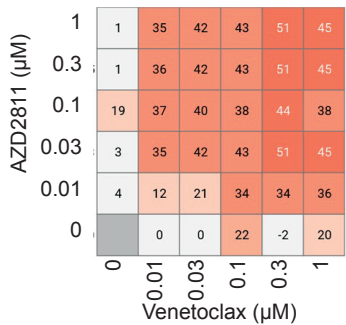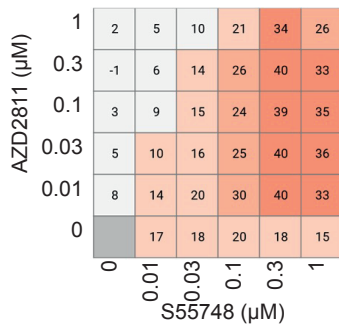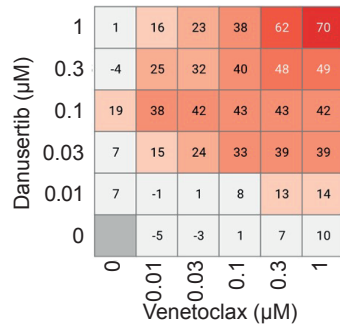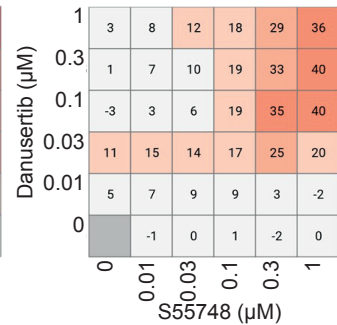

HSA 9.8

HSA 5.2

HSA 7.5

HSA 3.4

**B**

KARPAS422

AZD2811 + Venetoclax

AZD2811 + S55748

Danusertib + Venetoclax

Danusertib + S55748

Signals

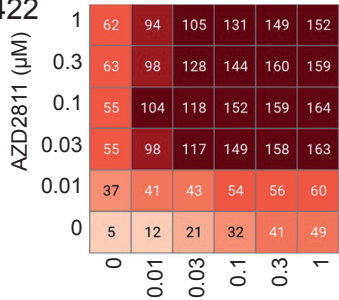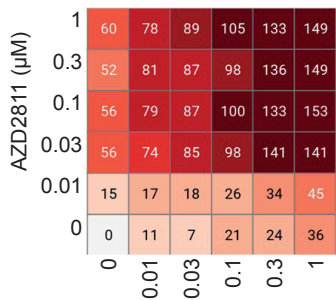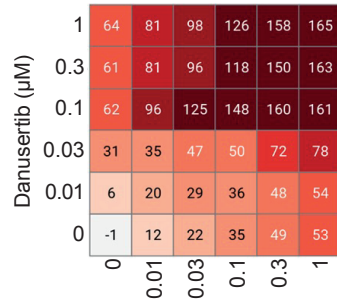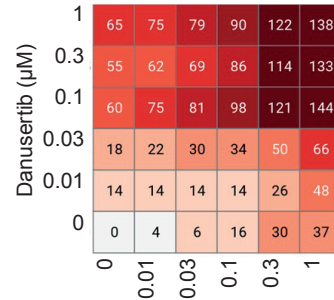

Excess

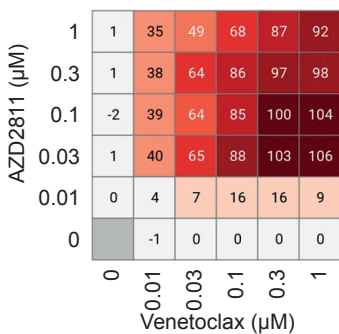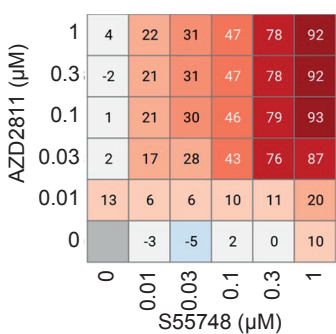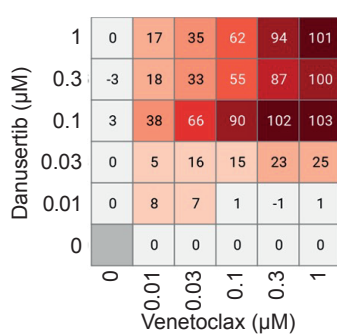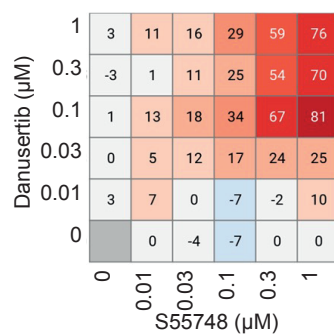

HSA 26.2

HSA14.5

HSA 17.2

HSA 7.5

**Supplementary Figure 11: Effect of Aurora kinase B or pan Aurora kinase plus BCL2 inhibition on cell viability in DLBCL cell lines**

Cell viability and HSA excess following treatment for 3 days with a 6 x 6 drug combination matrix in A) WSU DLBCL2 B) KARPAS422 cells. Cells were treated with Aurora kinase B inhibitor AZD2281 and pan-Aurora kinase inhibitor danusertib in combination with BCL2 inhibitors venetoclax and S55748. In the top panels, zero represents DMSO control, values 1 - 100 represent % growth inhibition and values > 100 represent cell death. HSA excess heatmaps indicate dose range where combination benefit was achieved.

A

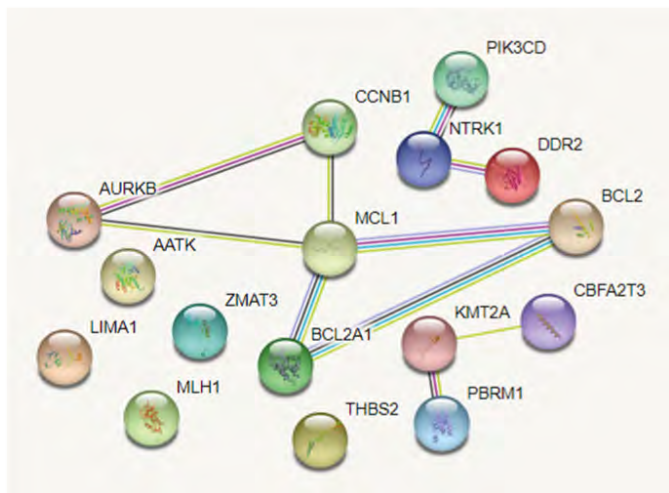

B

AZD5991 (MCL1); AZD5363 (AKT1, AKT2, AKT3) (GDSC\_008)

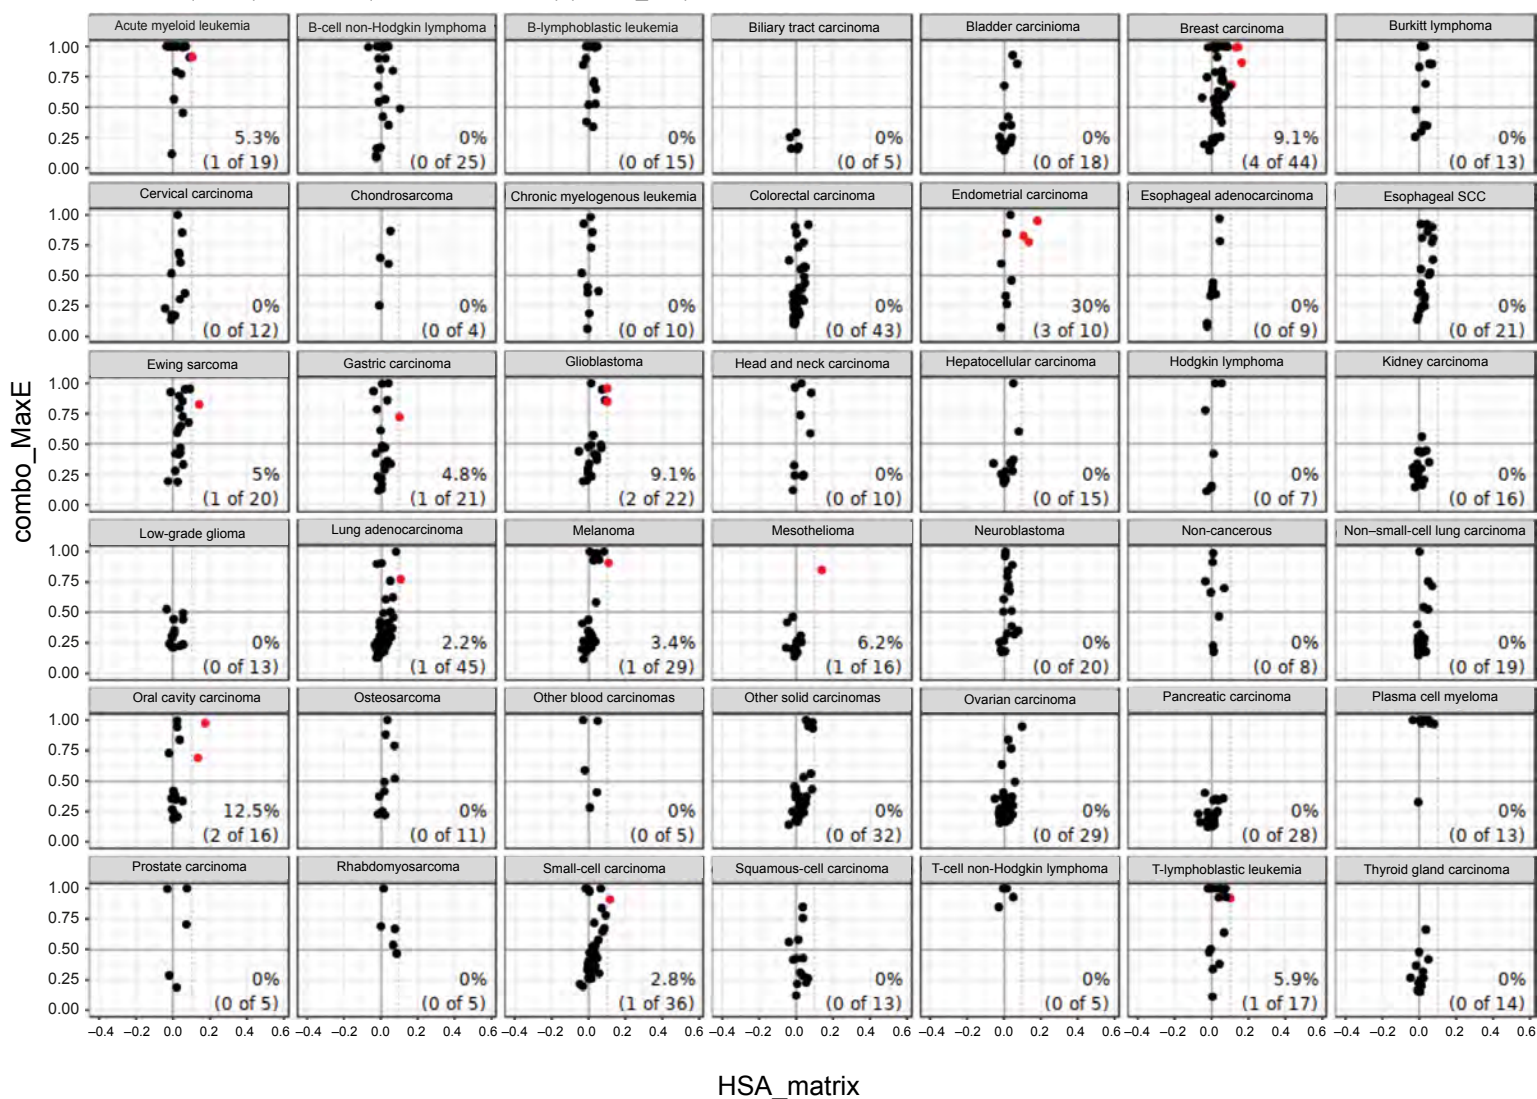

**Supplementary Figure 12: network analysis of AZD2811 plus venetoclax biomarkers and targets, and cancer type selectivity of AZD5991 + AZD5363.**

A: AZD2811 plus venetoclax STRING analysis of large (effect size >1) and significant ( $p < 0.05$ , FDR < 10) combination biomarkers in all or genetic baskets.

B: Capivaerstib plus AZD5991 combination activity (combination Emax versus HSA) in 41 cancer types included in this study. Each dot represents a cell line and cell lines showing high combination activity (combination Emax > 0.5 and HSA > 0.1) are in red.



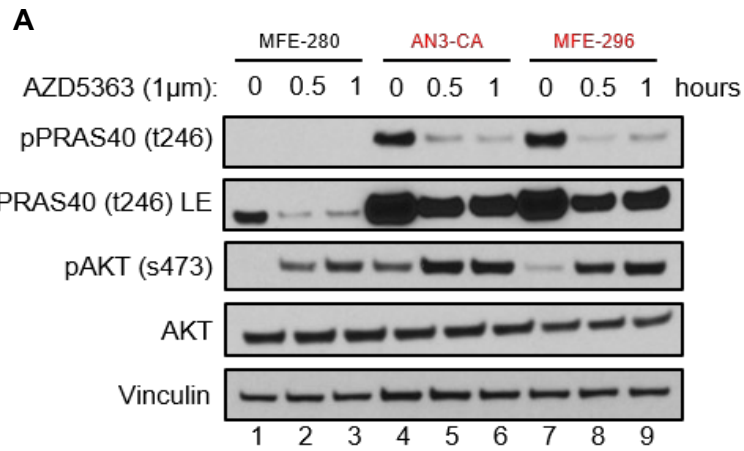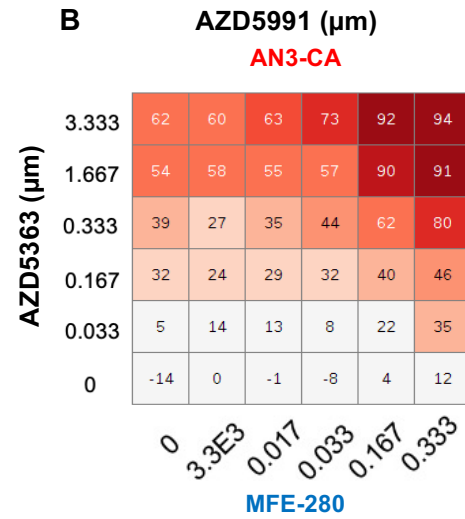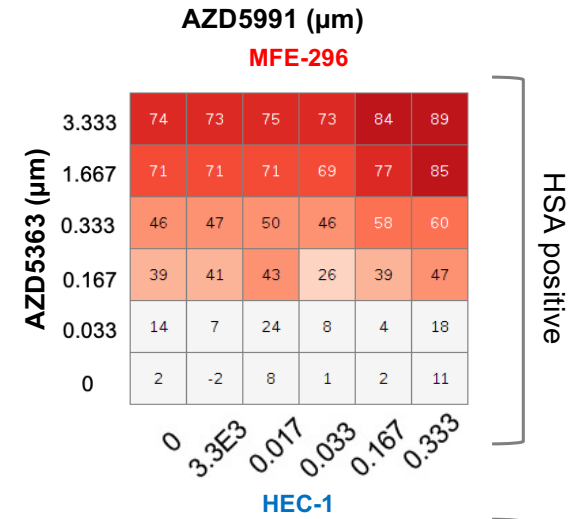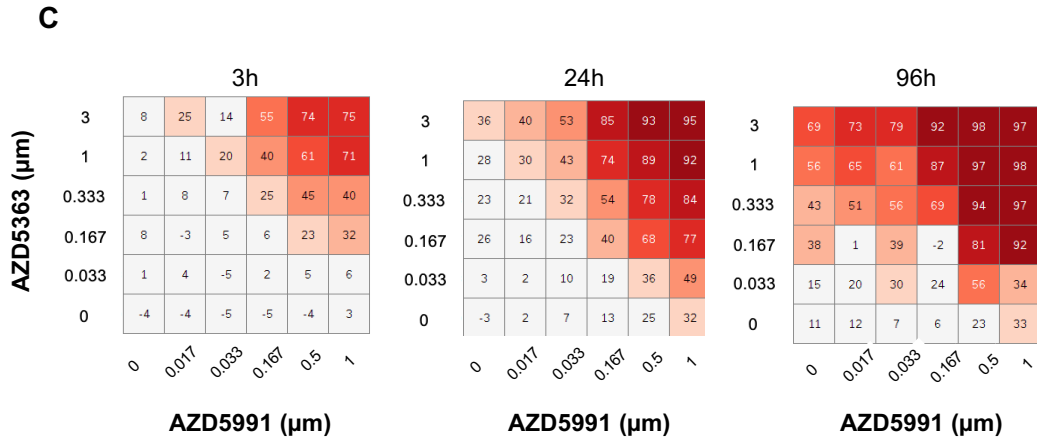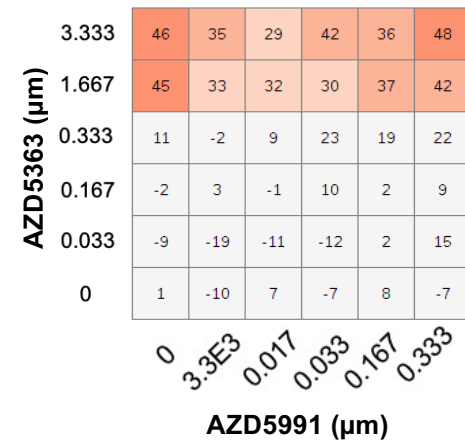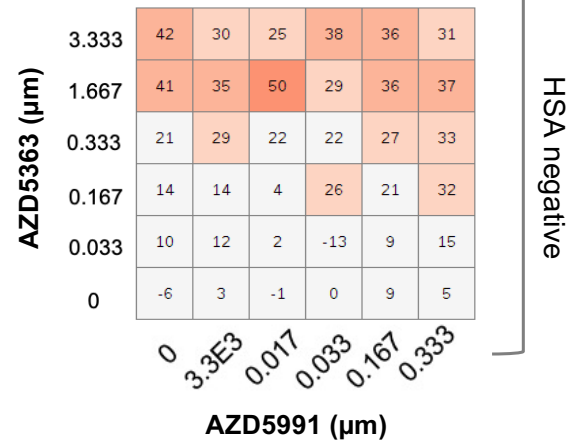



**Supplementary Figure 13: Further analysis of capivasertib (AZD5363) plus AZD5991 in endometrial cell lines**

A: Western blot showing elevated phosphorylation of AKT and PRAS40 in AN3-CA, MFE-296 PTEN altered cell lines (in red) compared to PTEN wild-type MFE-280 cells.

B: AZD5991 plus AZD5363 combination activity in HSA positive (AN3-CA, MFE-296) and HSA negative cell lines (MFE-280 and HEC-1).

C: Viability effect after 3, 24 or 96 hour treatment with AZD5363 + AZD5991.

For all experiments, except where indicated otherwise, cell viability was measured after 72 hours using CellTiter-Glo.

**A**

AN3CA

Signals

Excess

AZD5991 +  
capiasertibCapiasertib +  
tapotoclaxIpatasertib +  
AZD5991Ipatasertib +  
tapotoclax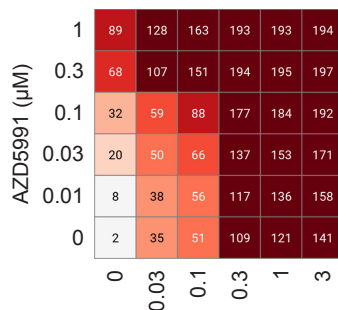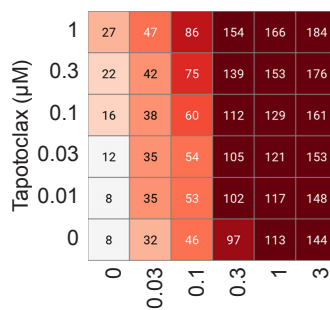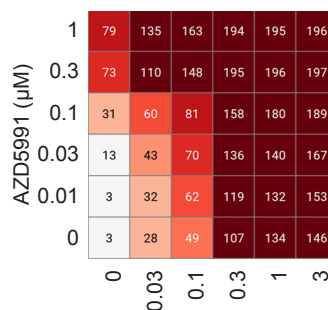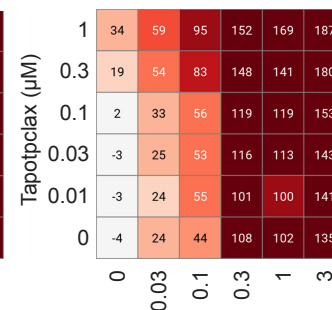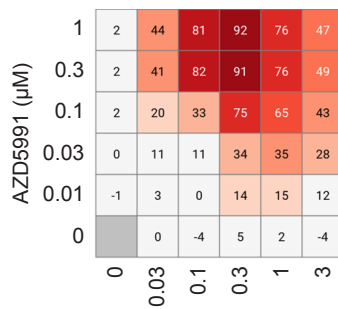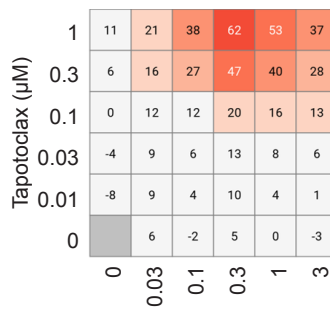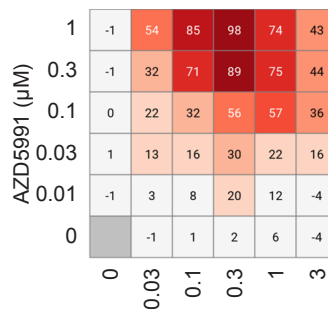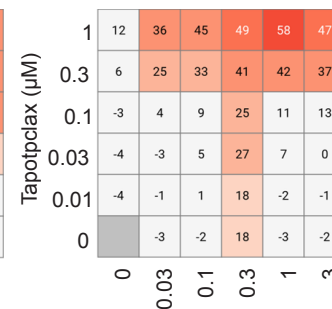Capiasertib ( $\mu\text{M}$ )Capiasertib ( $\mu\text{M}$ )Ipatasertib ( $\mu\text{M}$ )Ipatasertib ( $\mu\text{M}$ )

HSA 21.7

HSA 7.07

HSA 19.3

HSA 7.4

**B**

ME296

Signals

Excess

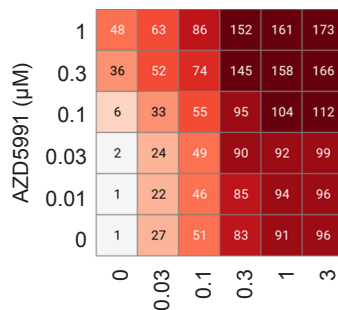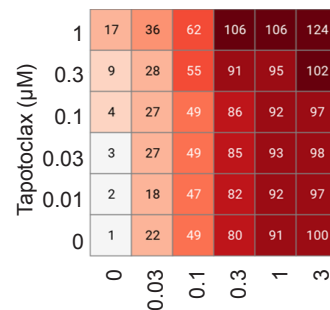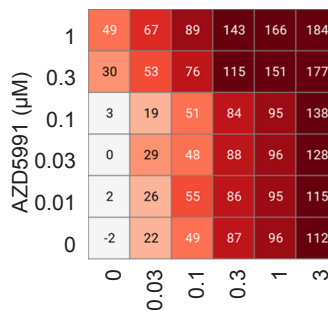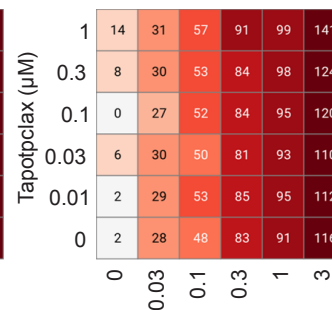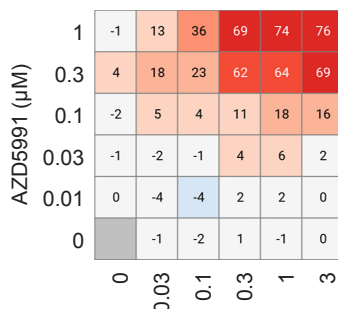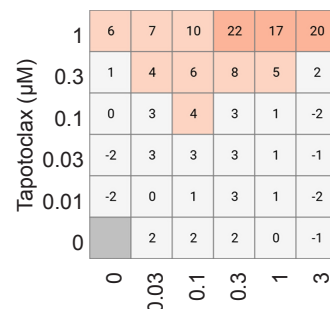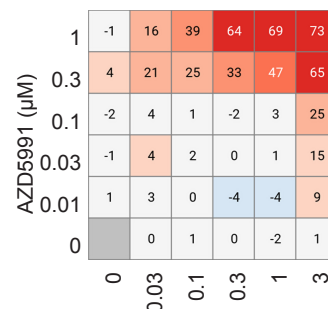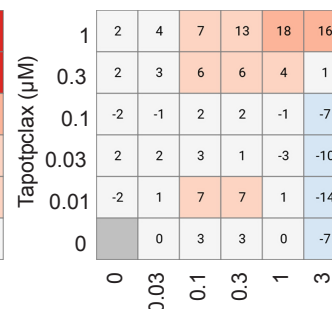Capiasertib ( $\mu\text{M}$ )Capiasertib ( $\mu\text{M}$ )Ipatasertib ( $\mu\text{M}$ )Ipatasertib ( $\mu\text{M}$ )

HSA 8.4

HSA 1.01

HSA 7.6

HSA 0.3

**Supplementary Figure 14: Effect of pan AKT inhibition plus MCL1 inhibition on cell viability in endometrial cell lines**

Cell viability and HSA excess following treatment for 3 days with a 6 x 6 drug combination matrix in (A) AN3CA (B) MFE296 cells. Cell lines were treated with AKT inhibitors capivasertib and ipatasertib in combination with MCL1 inhibitors AZD5991 and tapotoclax. In the top panels, zero represents DMSO control, values 1 - 100 represent % growth inhibition and values > 100 represent cell death. HSA excess heatmaps indicate dose range where combination benefit was achieved.

**AKT**

|       |    |       |       |       |     |    |
|-------|----|-------|-------|-------|-----|----|
| 3.333 | 24 | 32    | 54    | 82    | 84  | 82 |
| 1.667 | 18 | 33    | 40    | 77    | 84  | 82 |
| 0.333 | 25 | 26    | 29    | 49    | 64  | 64 |
| 0.167 | 8  | 7     | 10    | 32    | 32  | 45 |
| 0.033 | 16 | 18    | 16    | 37    | 28  | 30 |
| 0     | -3 | 18    | 8     | 15    | 15  | 21 |
|       | 0  | 0.017 | 0.033 | 0.167 | 0.5 | 1  |

**AZD5991 ( $\mu\text{m}$ )**

**PI3K $\beta/\delta$** 

|       |    |       |       |       |     |    |
|-------|----|-------|-------|-------|-----|----|
| 3.333 | 28 | 20    | 42    | 73    | 85  | 84 |
| 1.667 | 12 | 12    | 41    | 69    | 68  | 68 |
| 0.333 | 9  | 7     | 23    | 19    | 51  | 44 |
| 0.167 | 22 | 5     | 4     | 14    | 20  | 8  |
| 0.033 | 12 | 19    | 17    | 6     | 8   | 3  |
| 0     | 1  | 7     | 17    | 9     | 21  | 22 |
|       | 0  | 0.017 | 0.033 | 0.167 | 0.5 | 1  |

**AZD5991 ( $\mu\text{m}$ )**

**PI3K $\alpha$** 

|       |    |       |       |       |     |    |
|-------|----|-------|-------|-------|-----|----|
| 3.333 | 14 | 19    | 32    | 52    | 57  | 59 |
| 1.667 | 4  | 9     | 28    | 33    | 46  | 56 |
| 0.333 | 4  | 1     | 7     | 11    | 19  | 38 |
| 0.167 | 2  | -3    | 1     | 7     | 10  | 9  |
| 0.033 | -2 | -1    | -1    | -2    | 6   | -2 |
| 0     | -2 | -2    | -5    | 0     | 5   | 3  |
|       | 0  | 0.017 | 0.033 | 0.167 | 0.5 | 1  |

**AZD5991 ( $\mu\text{m}$ )**

**mTOR1**

|       |     |       |       |       |     |    |
|-------|-----|-------|-------|-------|-----|----|
| 3.333 | -5  | 0     | 16    | 1     | 4   | 17 |
| 1.667 | -3  | -1    | 20    | 1     | 17  | 15 |
| 0.333 | -8  | -2    | -6    | -2    | 16  | 16 |
| 0.167 | -5  | -1    | 8     | 2     | 10  | 7  |
| 0.033 | -12 | -5    | -4    | -3    | 15  | 3  |
| 0     | -1  | -4    | 2     | 3     | 2   | 8  |
|       | 0   | 0.017 | 0.033 | 0.167 | 0.5 | 1  |

**AZD5991 ( $\mu\text{m}$ )**

**PI3K $\alpha$** 

|       |    |       |       |       |     |    |
|-------|----|-------|-------|-------|-----|----|
| 3.333 | 14 | 19    | 32    | 52    | 57  | 59 |
| 1.667 | 4  | 9     | 28    | 33    | 46  | 56 |
| 0.333 | 4  | 1     | 7     | 11    | 19  | 38 |
| 0.167 | 2  | -3    | 1     | 7     | 10  | 9  |
| 0.033 | -2 | -1    | -1    | -2    | 6   | -2 |
| 0     | -2 | -2    | -5    | 0     | 5   | 3  |
|       | 0  | 0.017 | 0.033 | 0.167 | 0.5 | 1  |

**AZD5991 ( $\mu\text{m}$ )**

**mTOR1**

|       |     |       |       |       |     |    |
|-------|-----|-------|-------|-------|-----|----|
| 3.333 | -5  | 0     | 16    | 1     | 4   | 17 |
| 1.667 | -3  | -1    | 20    | 1     | 17  | 15 |
| 0.333 | -8  | -2    | -6    | -2    | 16  | 16 |
| 0.167 | -5  | -1    | 8     | 2     | 10  | 7  |
| 0.033 | -12 | -5    | -4    | -3    | 15  | 3  |
| 0     | -1  | -4    | 2     | 3     | 2   | 8  |
|       | 0   | 0.017 | 0.033 | 0.167 | 0.5 | 1  |

**AZD5991 ( $\mu\text{m}$ )**

**PI3K $\alpha$** 

|       |    |       |       |       |     |    |
|-------|----|-------|-------|-------|-----|----|
| 3.333 | 14 | 19    | 32    | 52    | 57  | 59 |
| 1.667 | 4  | 9     | 28    | 33    | 46  | 56 |
| 0.333 | 4  | 1     | 7     | 11    | 19  | 38 |
| 0.167 | 2  | -3    | 1     | 7     | 10  | 9  |
| 0.033 | -2 | -1    | -1    | -2    | 6   | -2 |
| 0     | -2 | -2    | -5    | 0     | 5   | 3  |
|       | 0  | 0.017 | 0.033 | 0.167 | 0.5 | 1  |

**AZD5991 ( $\mu\text{m}$ )**

**mTOR1**

|       |     |       |       |       |     |    |
|-------|-----|-------|-------|-------|-----|----|
| 3.333 | -5  | 0     | 16    | 1     | 4   | 17 |
| 1.667 | -3  | -1    | 20    | 1     | 17  | 15 |
| 0.333 | -8  | -2    | -6    | -2    | 16  | 16 |
| 0.167 | -5  | -1    | 8     | 2     | 10  | 7  |
| 0.033 | -12 | -5    | -4    | -3    | 15  | 3  |
| 0     | -1  | -4    | 2     | 3     | 2   | 8  |
|       | 0   | 0.017 | 0.033 | 0.167 | 0.5 | 1  |

**AZD5991 ( $\mu\text{m}$ )**

**Supplementary Figure 15: Further analysis of capivasertib (AZD5363) plus AZD5991 and other inhibitors in endometrial cell lines**

A: Cell viability after exposure to AZD5991 combined with AZD5363 (AKT inhibitor), AZD8186 (PI3K $\beta/\delta$  inhibitor), BYL791 (PI3K $\alpha$  inhibitor) and Rapamycin (mTOR inhibitor). For all experiments, except where indicated otherwise, cell viability was measured after 72 hours using CellTiter-Glo.

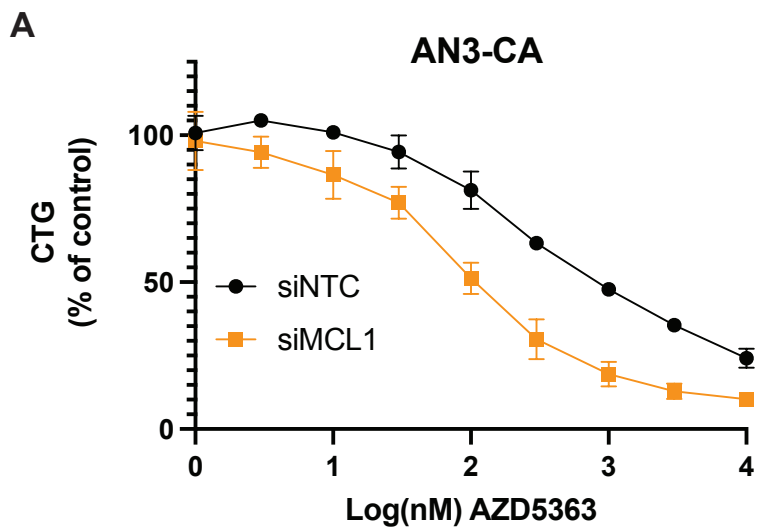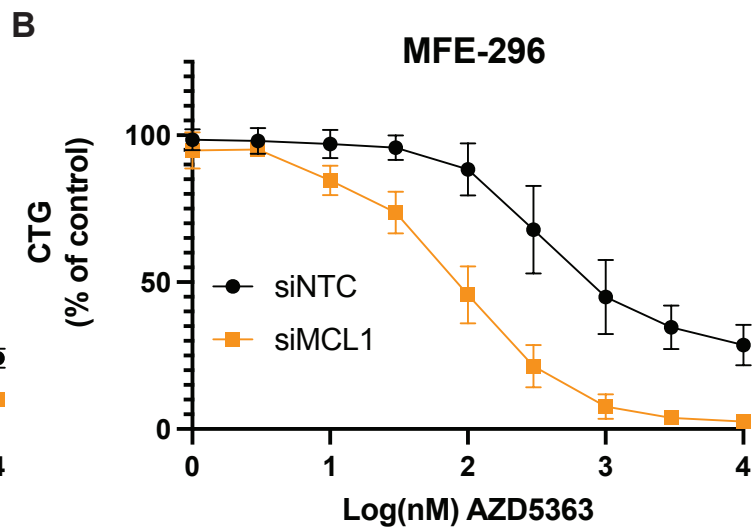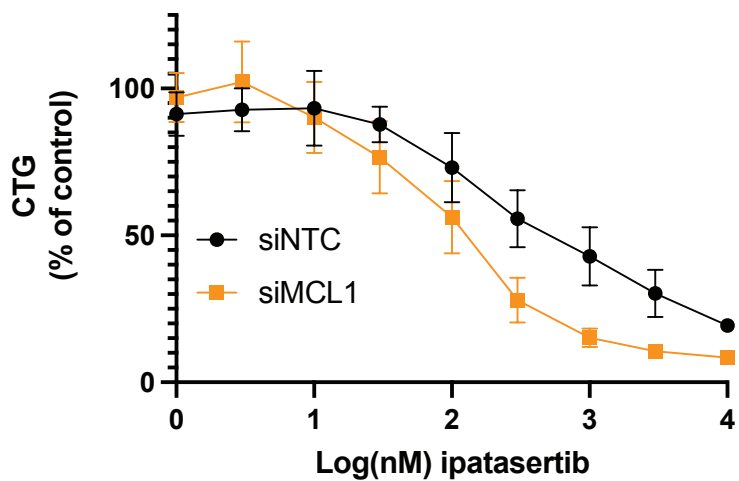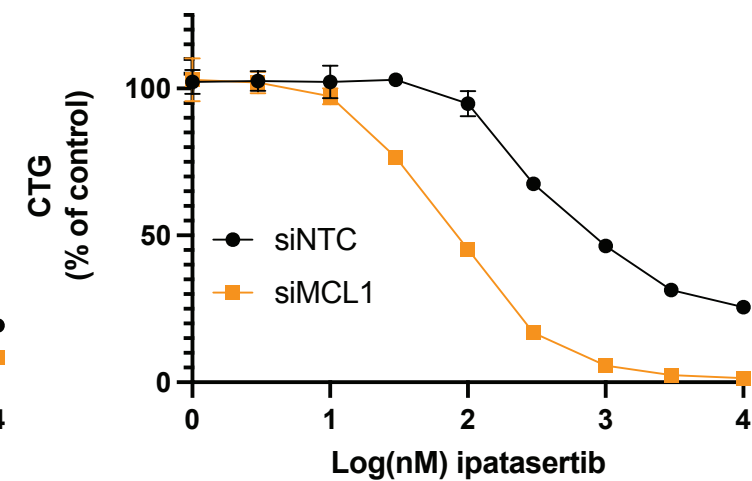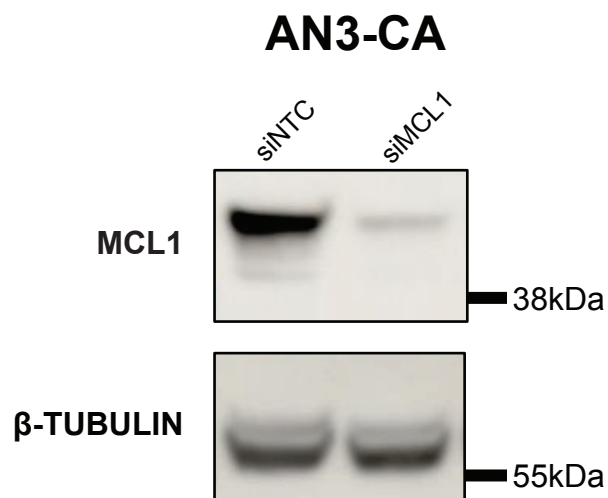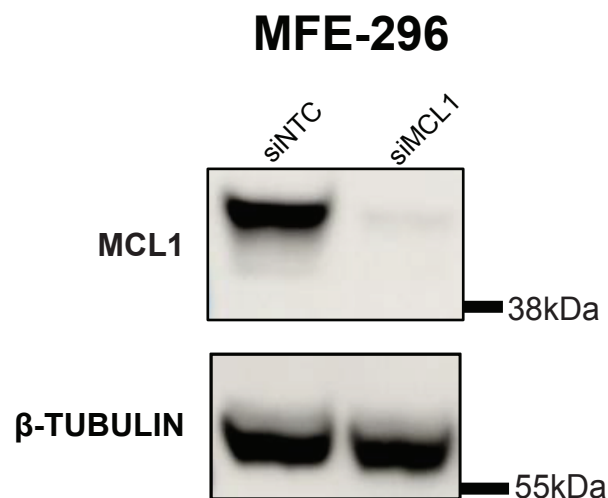

**Supplementary Figure 16: Effect of MCL1 genetic knockdown plus pan AKT inhibition on cell viability in endometrial cancer cell lines.**

A and B: siRNA knockdown of MCL1 increases sensitivity to AKT inhibitors AZD5363 and ipatasertib in (A) AN3-CA and (B) MFE-296 cells. Responses are from the mean of three biological replicas. NTC = non-targeting control siRNA.

C: AN3-CA and (D) MFE-296 cells were reverse transfected with MCL1 or control siRNAs and after 72 hrs knockdown was confirmed by Western blot. Data are representative of two independent experiments.
